# Supplementary material
Source: publisher figshare collection journal article supplement (https://sage.figshare.com/ndownloader/files/21001599)
Supplement: Supplementary file 1 [file 21001599]

## **Supplementary material for the manuscript “Identity among Brazilian student-athletes using multilevel regression and poststratification”**

### **Validation of the factorial structure of the Portuguese version of the Baller Identity Measurement Scale (BIMS-PT)**

An exploratory factor analysis (Principal Component Extraction; Varimax Rotation with Kaiser's normalization) was used to examine the number of factors within the BIMS-PT, starting from the proposed four-factor model of the BIMS and testing different models (e.g., three-factor or two-factor) in case the original model was not confirmed. We adopted the criteria of values  $\geq 0.40$  for an item loading on factor and no less than three items in a factor (Hair, Black, Babin, & Anderson, 2009). Overall, the exploratory factor analysis indicated that the BIMS-PT version presented a two-factor structure (Kaiser normalization = 0.84). Six items (e.g., number 1, 3, 6, 7, 8, and 10) loaded one factor only, whereas items number 2, 4, 5, and 9 loaded both factors. Overall, seven items loaded the factor named “Affectivity” ( $\alpha = 0.80$ ) and seven items in the factor named “Social Identity” ( $\alpha = 0.74$ ).

To examine the internal consistency of each factor, the Cronbach's alpha coefficients  $> 0.70$  were considered acceptable. Furthermore, a confirmatory factor analysis (CFA) was applied to examine the factorial structure of the model, using Chi-square ( $X^2$ ), Chi square ratio ( $X^2/df$ ), Tucker Lewis Index ( $TLI \geq 0.95$ ), Akaike Information Criteria (AIC), normed fit index ( $NFI \geq 0.95$ ), root mean square error of approximation ( $RMSEA \leq 0.05$ ), P of CLOSE fit (PCLOSE;  $p > 0.05$ ), and comparative fit index ( $CFI \geq 0.95$ ). The CFA indices showed to be acceptable: Chi-square ( $X^2$ ) = 34.548; Chi-square ratio = 1.33;  $TLI = 0.992$ ;  $AIC = 112.548$ ;  $NFI = 0.981$ ;  $RMSEA = 0.026$ ;  $PCLOSE = 0.977$ ; and  $CFI = 0.995$ .

**Variation among student-athletes' identity responses when aggregated by gender, sport type (individual and team sports), competitive level (local, state and national level) and university type (public and private).**

Varying intercept models assuming student-athletes (level-1) nested by group (level-2, e.g. gender) were used. The group-level parameters were used to measure the proportion of total variance which fell between-group, i.e. variance partition coefficient (Goldstein, 2011). Variance partition coefficients  $>0.05$  derived from the varying intercept models were interpreted as indicating a substantial variation for group.

Supplementary table 1. Estimates and variance partition coefficients (95% confidence intervals) of BIMS-PT factors responses among Brazilian student-athletes by gender, competitive level, type of sports, and type of university.

|                    | Affectivity          |                                         | Social Identity      |                                         |
|--------------------|----------------------|-----------------------------------------|----------------------|-----------------------------------------|
|                    | Estimations (95% CI) | Variance partition coefficient (95% CI) | Estimations (95% CI) | Variance partition coefficient (95% CI) |
| Gender             |                      | 0.00 (0.00 to 0.19)                     |                      | 0.00 <sup>a</sup>                       |
| Male               | 3.30 (3.14 to 3.45)  |                                         | 4.77 (4.66 to 4.90)  |                                         |
| Female             | 3.10 (2.97 to 3.24)  |                                         | 4.76 (4.65 to 4.87)  |                                         |
| Competitive level  |                      | 0.21 (0.06 to 0.55)                     |                      | 0.08 (0.02 to 0.32)                     |
| Local level        | 3.90 (3.75 to 4.04)  |                                         | 5.13 (5.00 to 5.25)  |                                         |
| State level        | 3.10 (2.91 to 3.30)  |                                         | 4.78 (4.60 to 4.96)  |                                         |
| National level     | 2.64 (2.51 to 2.77)  |                                         | 4.47 (4.36 to 4.59)  |                                         |
| Type of sports     |                      | 0.16 (0.00 to 0.80)                     |                      | 0.00 <sup>a</sup>                       |
| Individual sports  | 3.32 (3.10 to 3.54)  |                                         | 4.69 (4.51 to 4.87)  |                                         |
| Team sports        | 3.15 (3.04 to 3.27)  |                                         | 4.79 (4.70 to 4.88)  |                                         |
| Type of university |                      | 0.25 (0.05 to 0.95)                     |                      | 0.11 (0.02 to 0.44)                     |
| Private            | 2.62 (2.50 to 2.74)  |                                         | 4.47 (4.36 to 4.58)  |                                         |
| Public             | 3.76 (3.64 to 3.87)  |                                         | 5.08 (4.97 to 5.19)  |                                         |

<sup>a</sup> The 95% confidence intervals were too large and unreliable implying that no substantial variance was present at level-2, which means no differences between players when grouped at level-2
